# Supplementary material for: Iron-Storage Protein Ferritin Is Upregulated in Endometriosis and Iron Overload Contributes to a Migratory Phenotype
Source: PubMed Central journal article supplement (PMC7694081; doi:10.3390/biomedicines8110454), 2020-10-27

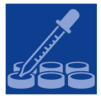

Article

# Iron-Storage Protein Ferritin is Upregulated in Endometriosis and Iron Overload Contributes to a Migratory Phenotype

Jeong-Hwa Woo, Youn Seok Choi and Jung-Hye Choi

## Methods

### MTT Assay

To analysis cell viability, 3-(4,5-dimethylthiazol-2-yl)-2,5-diphenyl-tetrazolium bromide (MTT) assay was carried out. Cells were plated in a 96-well plate ( $5 \times 10^4$  cells/well) and incubated overnight to allow adhesion of the cells. After treatment with  $\text{FeSO}_4$  and FAC, the cells were incubated for 24 h. Then, 50  $\mu\text{L}$  of MTT solution (1 mg/mL stock solution) was added into each well and the plate was incubated for another 3 h. Formazan crystal formed in the cells was dissolved in DMSO after removal of culture medium. The absorbance at 540 nm was measured in a microplate reader (SpectraMax; Molecular Devices, Sunnyvale, CA, USA).

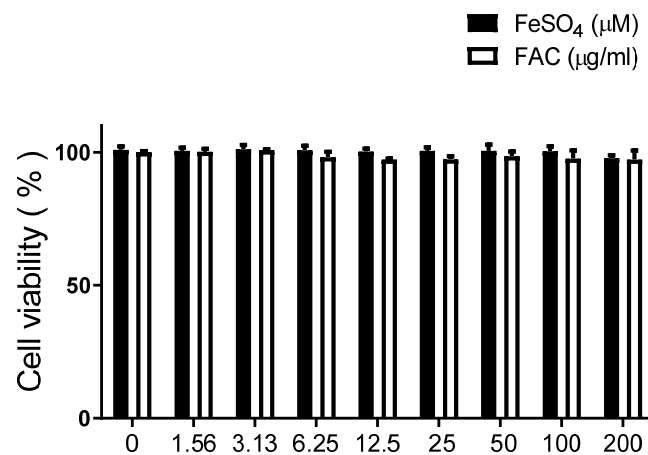

**Figure S1.** Effect of  $\text{FeSO}_4$  and FAC on viability of 12Z cells. 12Z cells were treated with various concentration of  $\text{FeSO}_4$  and FAC for 24. MTT assay were performed.

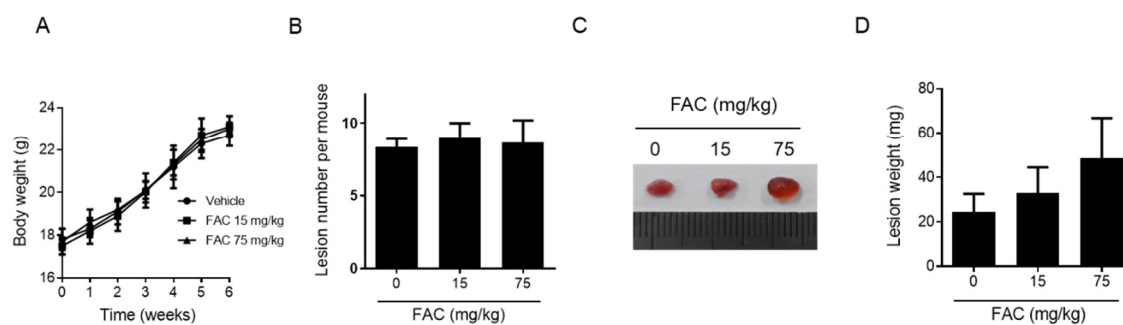

**Figure S2.** Effect of FAC on endometriotic lesion formation in female BALB/c mice. Female BALB/c mice were intraperitoneally administered with vehicle (0.05% CMC), FAC (15mg/kg) or FAC (75 mg/kg) three times per week for 5 weeks. **(A)** Body changes were measured every week. **(B)** Numbers of endometriotic lesions on the peritoneum and visceral organs. **(C)** Representative image of endometriotic lesions **(D)** Weight of endometriotic lesions.

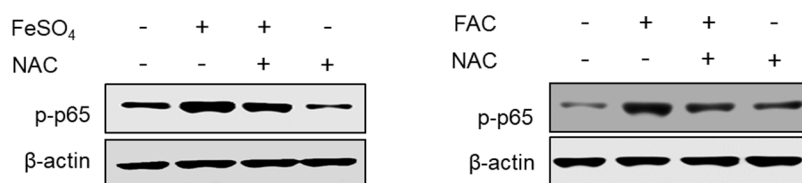

**Figure S3.** Effect of NAC on iron-induced activation of NFκB in 12Z cells. Human endometriotic 12Z cells were treated with iron (FeSO<sub>4</sub>: 100 μM, FAC: 100 μg/ml) in the presence of NAC for 24 h. p-p65 expression was determined by Western blot analysis. β-Actin was used as loading control. Representative images of three independent experiments are shown.

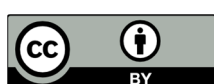

Supplement: biomedicines-08-00454-s001.pdf [file biomedicines-08-00454-s001.pdf]
